# Supplementary material
Source: MDPI journal article supplement (https://www.mdpi.com/2673-8929/3/1/5)
Supplement: s1 [file s1]

Table A1: Vibration band assignment for collected and analyzed samples

| Vibration band assignment      | C=O stretching (saturated esters) | Aromatic ring vibration | C <sup>α</sup> -C-O asymmetric stretching (aromatic esters) | O-C'-C'' aromatic ester stretching | O=C-O-C' stretching | C=C stretching | C-H vibration in aromatic ring |
|--------------------------------|-----------------------------------|-------------------------|-------------------------------------------------------------|------------------------------------|---------------------|----------------|--------------------------------|
| Reference                      | [21]                              | [22]                    | [21]                                                        | [21]                               | [22]                | [22]           | [22]                           |
| Wavenumber [cm <sup>-1</sup> ] | 1750-1735                         | 1409                    | 1310-1250                                                   | 1100                               | 1021                | 967            | 869                            |
| material_1_plain               | 1738                              | 1414                    | 1307                                                        | 1141                               | 1026                | 975            | 876                            |
| alpha_a1                       | 1736                              | 1415                    | 1309                                                        | 1108                               | 1026                | 975            | 875                            |
| alpha_a1_cluster               | 1730                              | 1414                    | 1303                                                        | 1109                               | 1026                | 975            | 880                            |
| alpha_a1_sc                    | 1736                              | 1411                    | 1290                                                        | 1114                               | 1016                | 971            | 873                            |
| alpha_b1                       | 1721                              | 1411                    | 1305                                                        | 1123                               | 1019                | 974            | 864                            |
| beta_a1                        | 1730                              | 1409                    | 1334 [w]/1299 [s]                                           | 1125                               | 1026                | 971            | 872                            |
| beta_a1_2                      | 1733                              | 1408                    | 1341 [w]/1293 [s]                                           | 1100                               | 1022                | 971            | 870                            |
| gamma_b1                       | 1734                              | 1414                    | 1334                                                        | 1145                               | 1022                | 975            | 872                            |
| material_2_plain               | 1742                              | 1417                    | 1303                                                        | 1141                               | 1026                | 975            | 876                            |
| alpha_a2                       | 1730                              | 1411                    | 1344 [w]/1290[s]                                            | 1132                               | 1025                | 974            | 848                            |
| alpha_a2_1                     | 1730                              | 1408                    | 1341                                                        | 1135                               | 1016                | 971            | 873                            |
| alpha_a2_2                     | 1730                              | 1411                    | 1338[w]/1284[s]                                             | 1107                               | 1025                | 977            | 873                            |
| beta_a2                        | 1738                              | 1414                    | 1342 [w]/1299[s]                                            | 1141                               | 1026                | 975            | 872                            |
| gamma_a2                       | 1730                              | 1410                    | 1340                                                        | 1093                               | 1020                | 977            | 877                            |
| material_3_plain               | 1734                              | 1414                    | 1307                                                        | 1145                               | 1026                | -              | 880                            |
| alpha_a3                       | 1738                              | 1414                    | 1303                                                        | 1137                               | 1026                | 979            | 876                            |
| alpha_b3                       | 1742                              | 1417                    | 1346[w]/1307[s]                                             | 1141                               | 1026                | 979[w]         | 876                            |
| alpha_c3                       | 1734                              | 1413                    | 1303[s]                                                     | 1133                               | 1022                | -              | 876                            |
| gamma_a3                       | 1742                              | 1417                    | 1342[w]/1299[s]                                             | 1141                               | 1026                | 975            | 876                            |

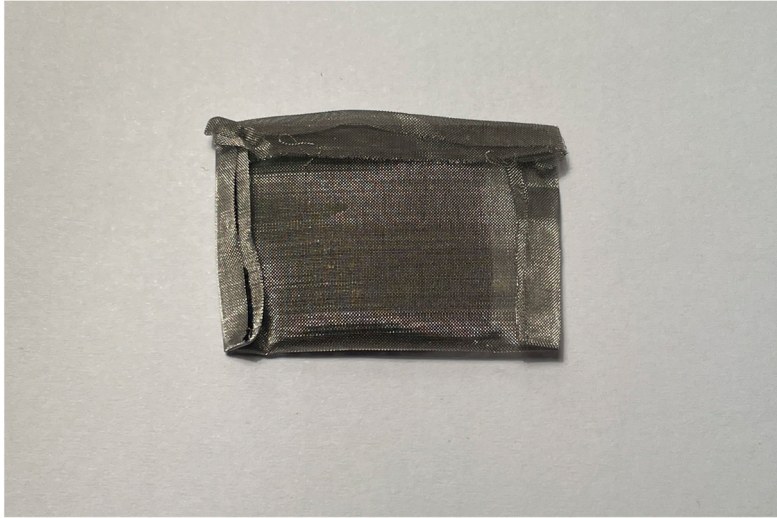

Figure S1: The folded envelope of filter used in conducted experiment

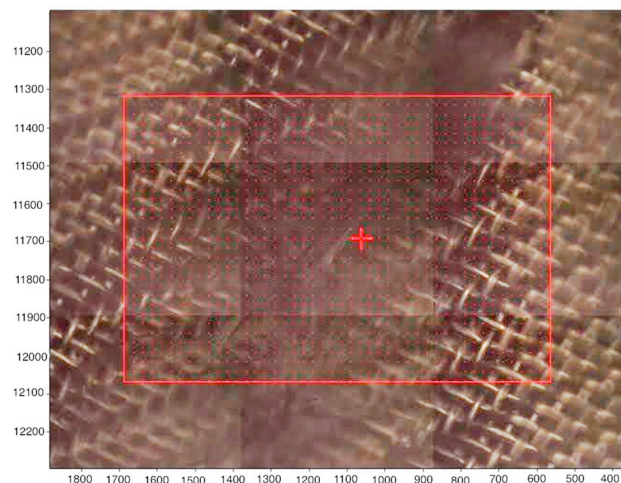

(a)

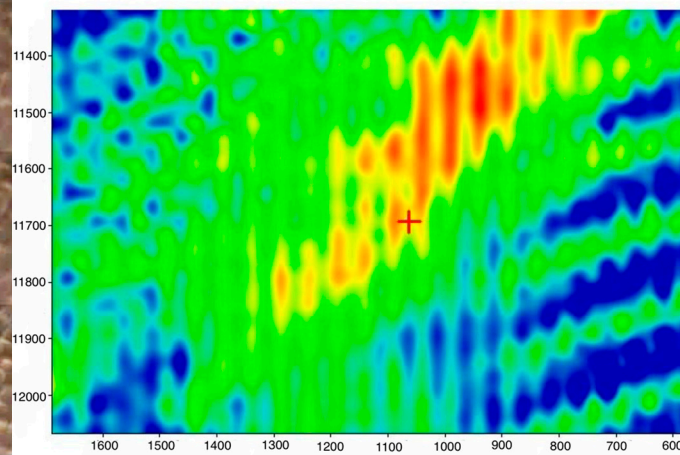

(b)

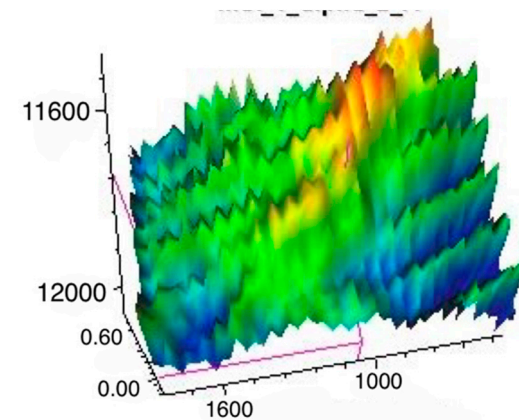

(c)

Figure S2: Images taken from sample alpha\_a1\_cluster (scale in micrometers): (a) microscopic photo, (b) 2D map, (c) 3D map

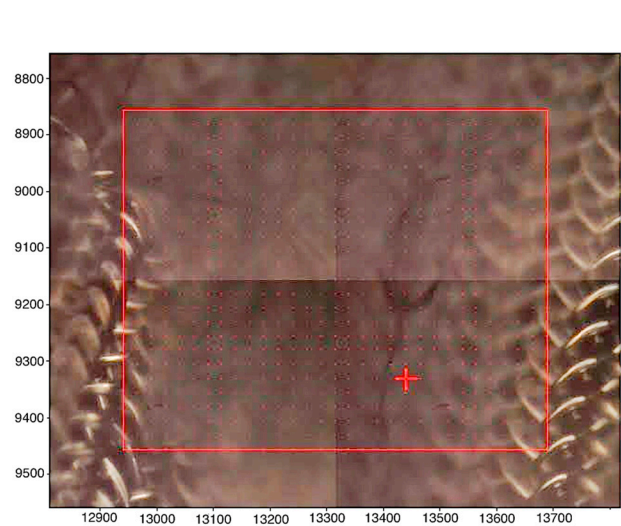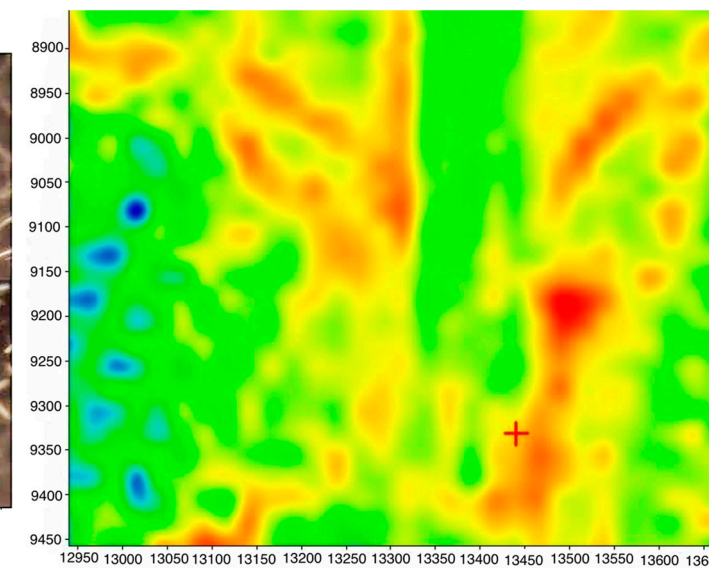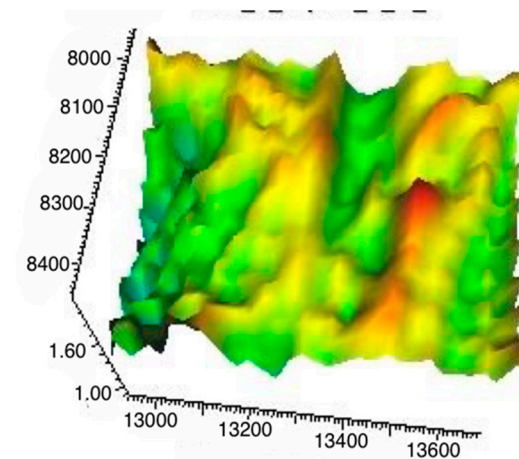

(a)

(b)

(c)

Figure S3: Images taken from sample alpha\_a1\_sc (scale in micrometers): (a) microscopic photo, (b) 2D map, (c) 3D map

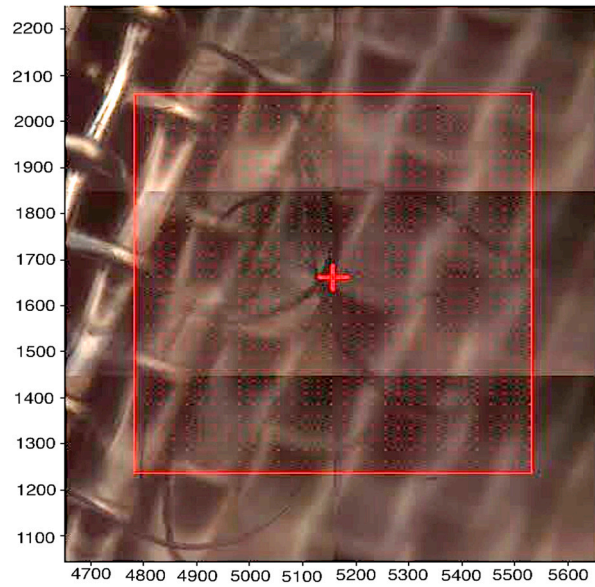

(a)

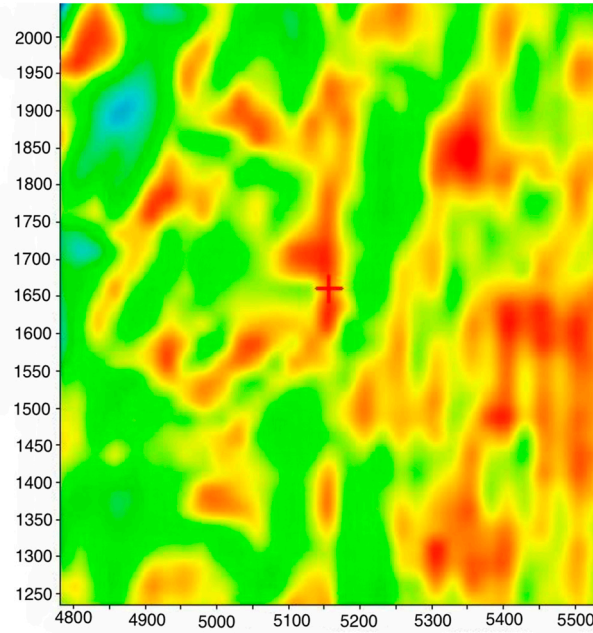

(b)

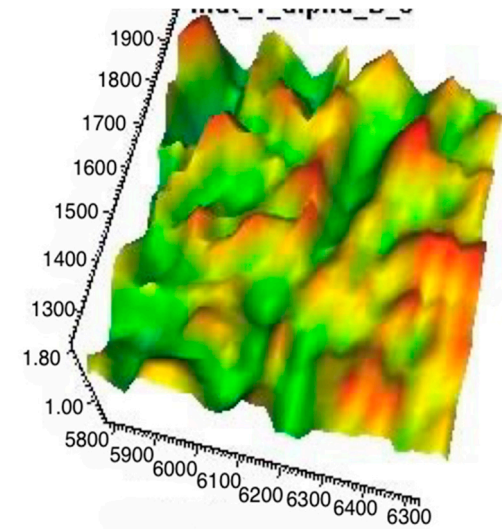

(c)

Figure S4: Images taken from sample alpha\_b1 (scale in micrometers): (a) microscopic photo, (b) 2D map, (c) 3D map



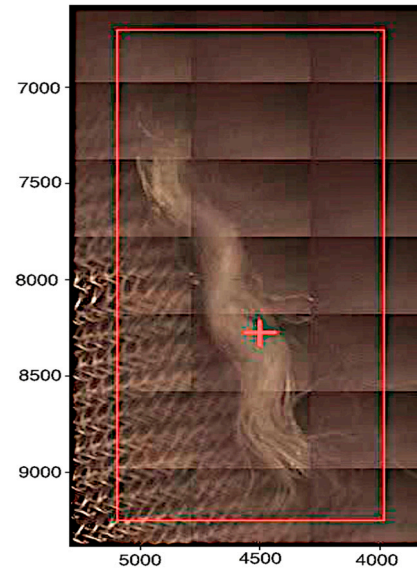

(a)

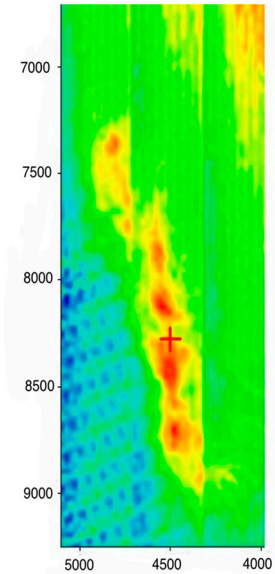

(b)

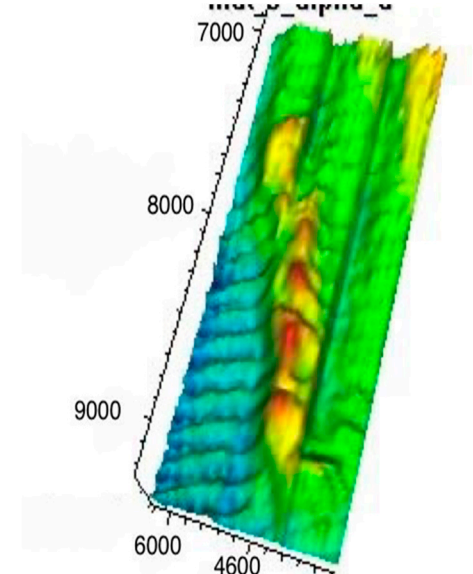

(c)

Figure S5: Images taken from sample alpha\_a3 (scale in micrometers): (a) microscopic photo, (b) 2D map, (c) 3D map

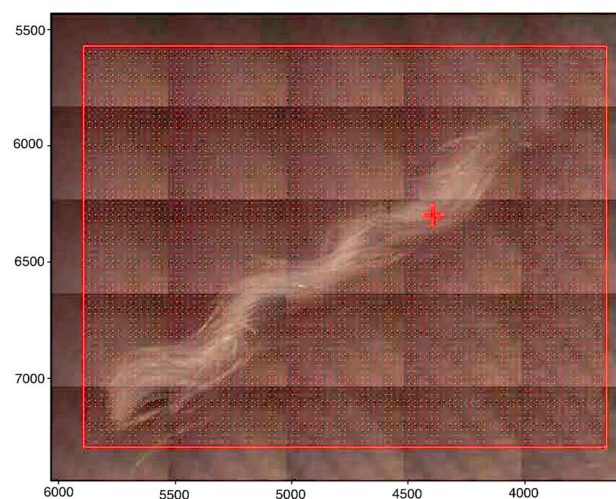

(a)

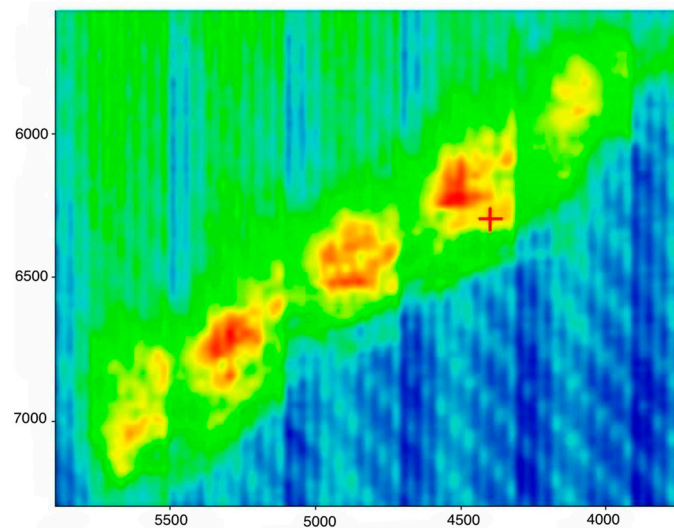

(b)

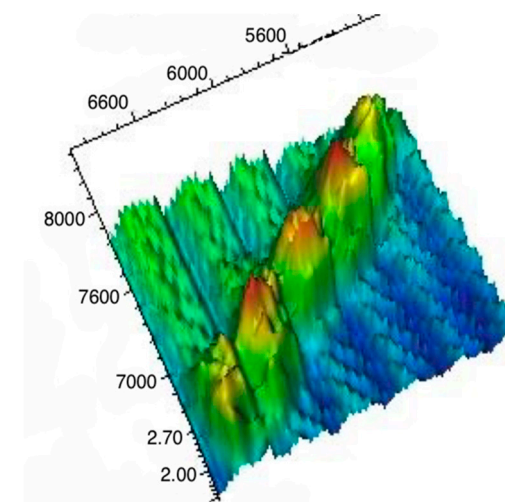

(c)

Figure S6: Images taken from sample gamma\_a3 (scale in micrometers): (a) microscopic photo, (b) 2D map, (c) 3D map

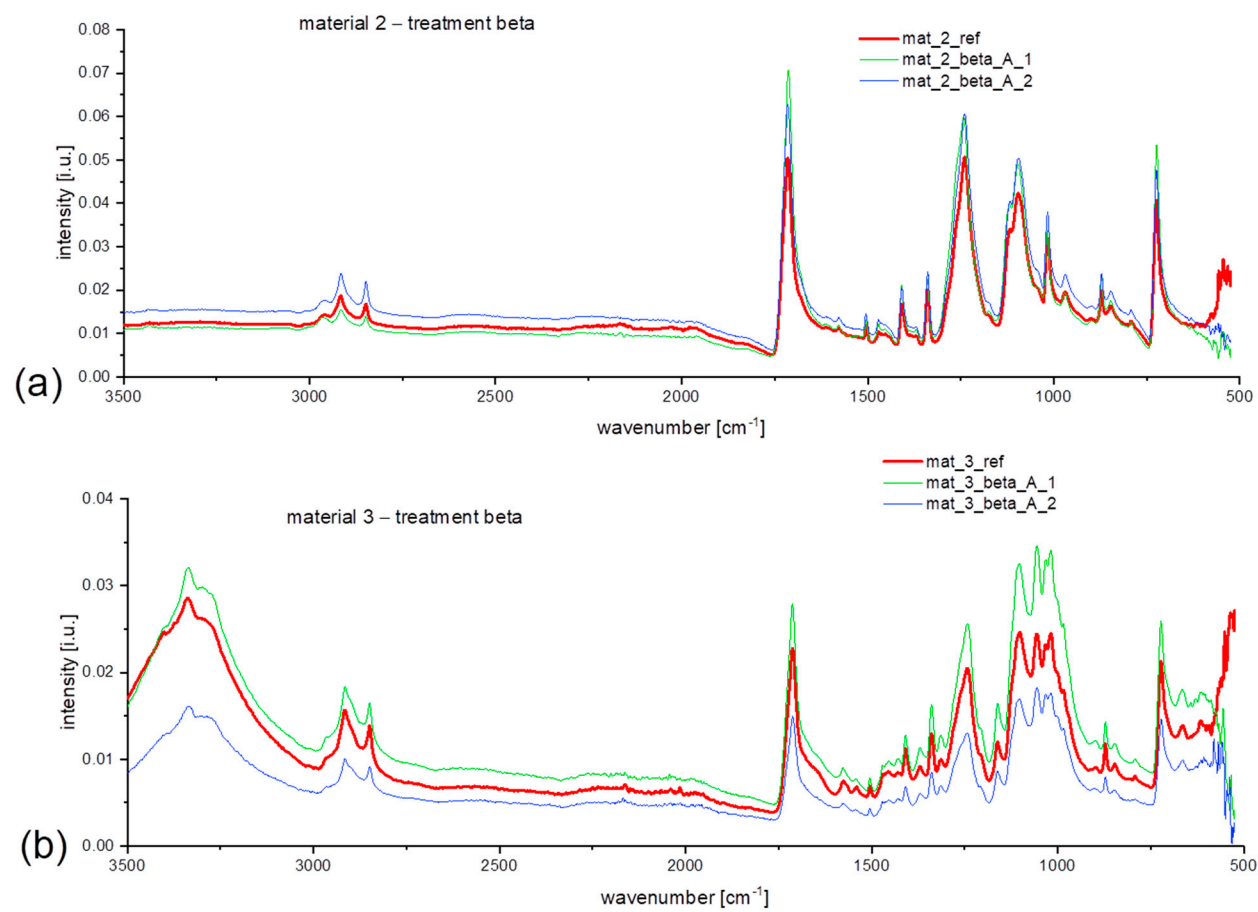

Figure S7: ATR spectra for (a) material 2, treatment beta, (b) material 3, treatment beta
